# Supplementary material for: An Equiatomic 20-Element High Entropy Amorphous Alloy: Ab Initio Molecular Dynamics Investigations
Source: Preprints.org preprint supplement (doi:10.20944/preprints202402.1010.v1), 2024-02-19
Supplement: Supplementary file 1 [file supplementary]

**An Equiatomic 20-Element High Entropy Amorphous Alloy: *Ab Initio* Molecular Dynamics Investigations**

Chang Ming Fang, Brian Cantor and Zhongyun Fan

Brunel Centre for Advanced Solidification Technology (BCAST), Brunel University London, Uxbridge, UB8 3PH, United Kingdom.

Supplementary Materials


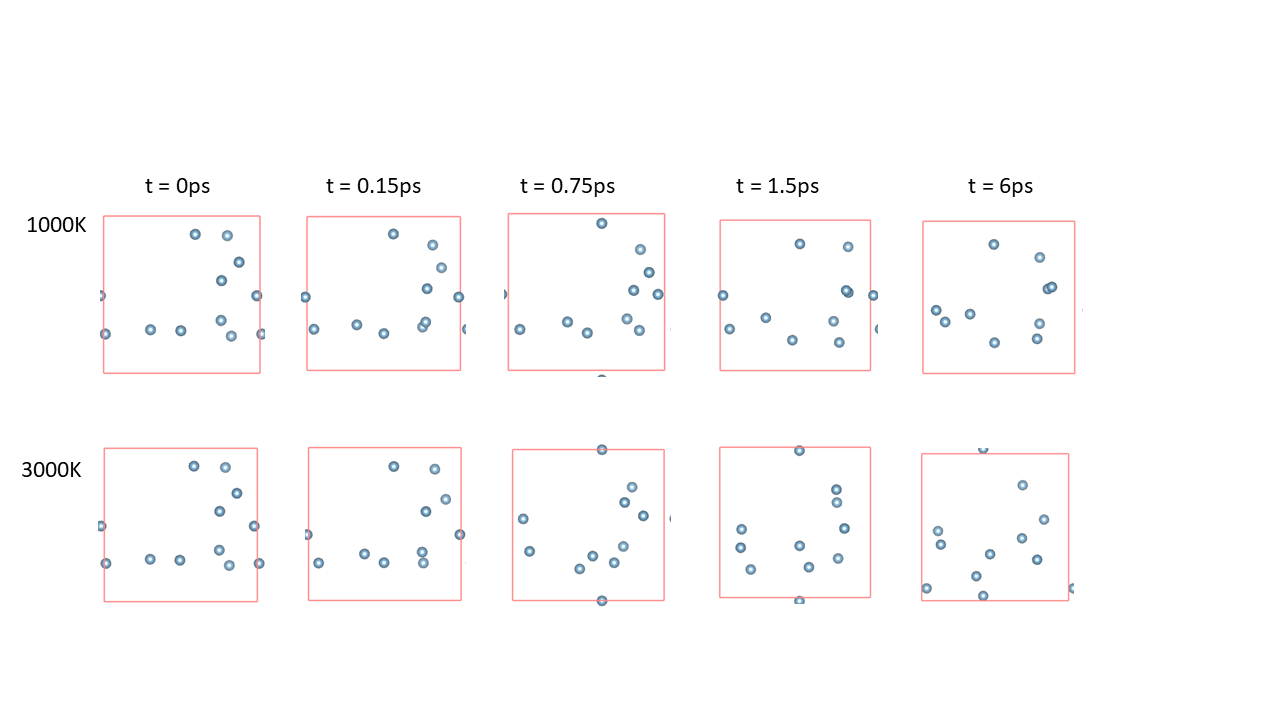


(a)


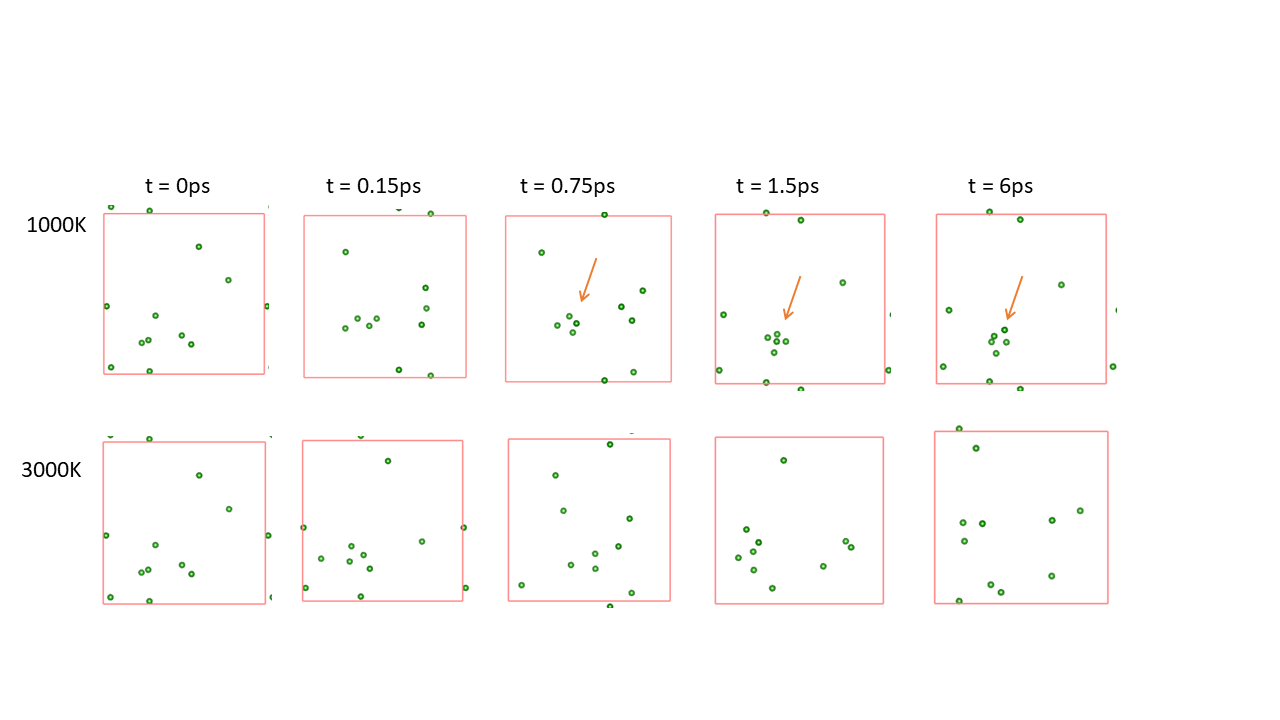


(b)

Figure S1. Evolution of Al (a) and B (b) atoms at 3000 K and 1000K during the AIMD simulations.

Clearly, at 3000 K, there is not M-M atomic clusters exist for long for most metallic atoms.

At 1000K B-B clusters were observed which exist for picoseconds, whereas the Al atoms are still moving in the box.


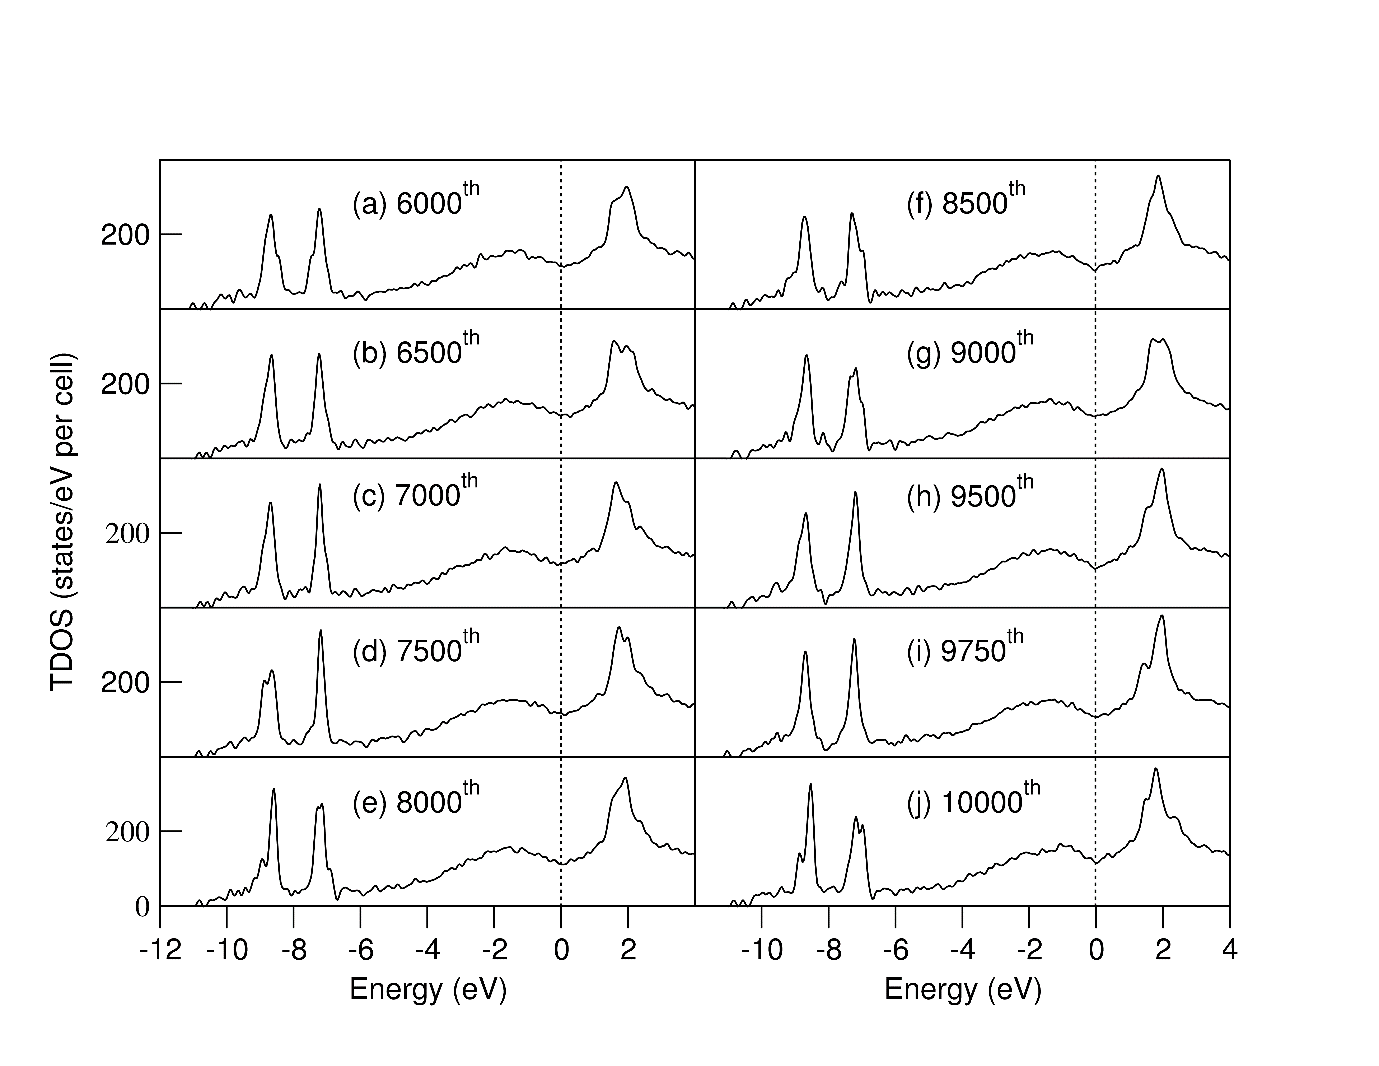


Figure S-2. Total density of states (TDOS) for 20 fully relaxed 20-HEAA samples. The numbers in the figure mean the iteration for the sample to be taken. The Fermi level is at zero eV as indicated by the dotted perpendicular lines.

Clearly, the TDOS curves are similar to each other. This agrees with the solid-state physics that all valence electrons belong to the whole crystal. The similarity of the TDOS indicates that the electron-electron and electron-cores interactions require the atomic distributions in the system trend to its lowest energy potential at the conditions.

Moreover, the localized nature of the Zn 3d and Cd 4d states is displayed well, indicating they contribute little to the chemical bonding.


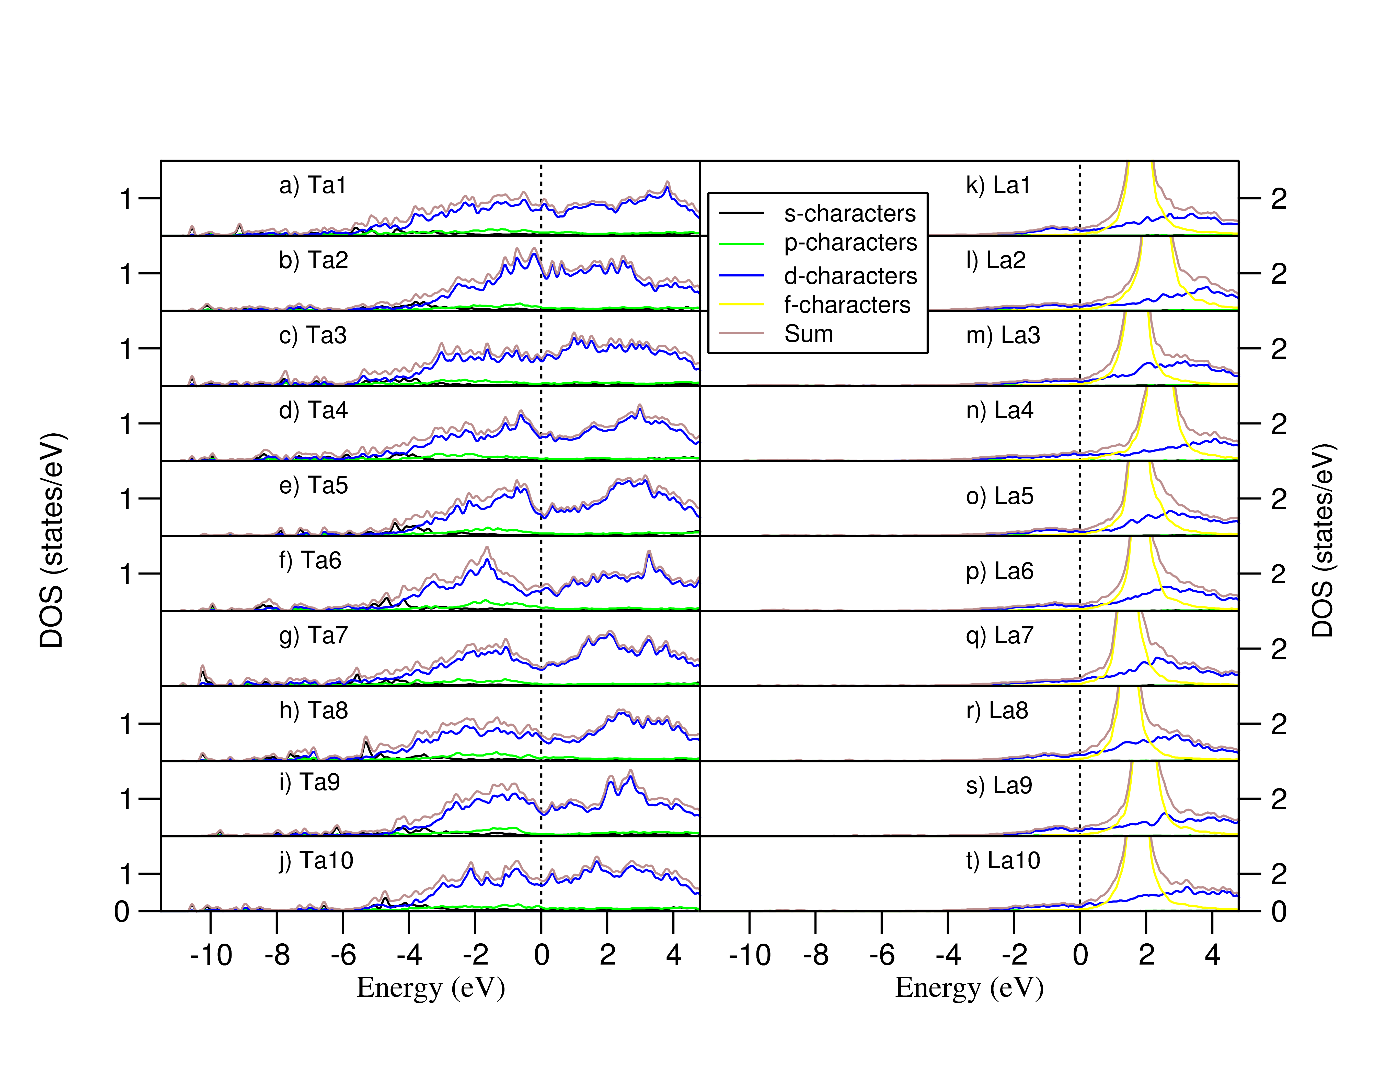


Figure S-3. Partial density of states (pDOS) for each Ta (a to j) and La (k to t) atoms in the system.

Clearly, the frames of the pDOS curves for each atomic species are similar to each other. However, there are subtle differences between the atoms of each species, due to its local chemical environment.

Both upper part of the valence and lower part of the conduction band of Ta are dominated by the 5d states.

The lower part of the conduction band of La are dominated by La 4f states. La 5d states are dominating the upper part of the conduction band and the bottom of the conduction band.

Notably, the frames of the DOS curves of all the atoms under very different topological and chemical conditions exhibit strong similarity.
